# Supplementary material for: Ti2P monolayer as a high performance 2-D electrode material for ion batteries
Source: Royal Society of Chemistry journal article supplement (doi:10.1039/d0cp02874f), 2020-01-01
Supplement: d0cp02874f1.pdf [file d0cp02874f1.pdf]

*Supporting Information for*

**Ti<sub>2</sub>P monolayer as a high performance 2-D electrode material  
for ion batteries**

Zishuang Cheng,<sup>1</sup> Xiaoming Zhang,<sup>1,2,\*</sup> Hui Zhang,<sup>1</sup> Heyan Liu,<sup>1,2</sup> Xiao Yu,<sup>1,2</sup> Xuefang Dai,<sup>1</sup>  
Guodong Liu,<sup>1</sup> and Guifeng Chen<sup>1,\*</sup>

<sup>1</sup>School of Materials Science and Engineering, Hebei University of Technology, Tianjin 300130, China.

<sup>2</sup>State Key Laboratory of Baiyunobo Rare Earth Resource Researches and Comprehensive Utilization,  
Baotou Research Institute of Rare Earths, Baotou, 014030, China.

E-mail: zhangxiaoming87@hebut.edu.cn; cgfchen@hebut.edu.cn

## **Contents of Supporting Information**

1. The detailed computational methods
2. Evolution of the potential energy versus simulation time for  $\text{Ti}_2\text{P}$  monolayer during AIMD (Figure S1)
3. The optimized structures of the increasing of the Li/Na concentrations (Figure S2)
4. Layered adsorption energy at different temperatures (Table S1)

## COMPUTATIONAL DETAILS

The first principles calculations in this work were realized by using the Vienna ab initio Simulation Package (VASP) [1], based on density functional theory (DFT) [2]. For the exchange-correlation potential, we applied the generalized gradient approximation (GGA) of the Perdew-Burke-Ernzerhof (PBE) functional [3, 4]. The cutoff energy was set as 500 eV during the calculations. To avoid artificial interaction between two isolated monolayers, a vacuum with the thickness of 20 Å was built in the bare Ti<sub>2</sub>P monolayer. During the calculations, the long-range van der Waals interactions were taken into account by using the DFT-D2 method [5]. For geometrical optimization, a 7×7×1 k-mesh was applied, while a 9×9×1 k-mesh was used in static energy calculations. The force and energy convergence criteria were set as 0.01 eV Å<sup>-1</sup> and 10<sup>-6</sup> eV, respectively. To investigate the dynamical stability of Ti<sub>2</sub>P monolayer, the phonon spectra were calculated by using the PHONOPY package [6, 7]. The climbing-image nudged elastic band (CI-NEB) method [8, 9] was used to obtain the diffusion barrier height during the ion diffusion process.

## References

- [1] G. Kresse, J. Furthmuller. Efficient Iterative Schemes for ab Initio Total-Energy Calculations Using a Plane-Wave Basis Set. *Phys. Rev. B.* **1996**, 54, 11169.
- [2] G. Kresse, D. Joubert. From Ultrasoft Pseudopotentials to the Projector Augmented-Wave Method. *Phys. Rev. B.* **1999**, 59, 1758–1775.
- [3] J. P. Perdew, K. Burke, Y. Wang. Generalized Gradient Approximation for the Exchange-Correlation Hole of a Many-Electron System. *Phys. Rev. B.* **1996**, 54, 16533–16539.
- [4] J. P. Perdew, K. Burke, M. Ernzerhof, Generalized Gradient Approximation Made Simple. *Phys. Rev. Lett.* **1996**, 77, 3865–3868.
- [5] S. Grimme. Semiempirical GGA-Type Density Functional Constructed with a Long-Range Dispersion Correction. *J. Comput. Chem.* **2006**, 27, 1787–1799.
- [6] A. Togo, F. Oba, I. Tanaka. First-principles calculations of the ferroelastic

transition between rutile-type and CaCl<sub>2</sub>-type SiO<sub>2</sub> at high pressures. *Phys. Rev. B: Condens. Matter Mater. Phys.* **2008**, 78, 134106.

[7] X. Gonze, C. Y. Lee. Dynamical matrices, Born effective charges, dielectric permittivity tensors, and interatomic force constants from density-functional perturbation theory. *Phys. Rev. B: Condens. Matter Mater. Phys.* **1997**, 55, 10355–10368.

[8] G. Henkelman, B. P. Uberuaga, H. Jónsson. A Climbing Image Nudged Elastic Band Method for Finding Saddle Points and Minimum Energy Paths. *J. Chem. Phys.* **2000**, 113, 9901.

[9] G. Henkelman, H. Jónsson. Improved Tangent Estimate in the Nudged Elastic Band Method for Finding Minimum Energy Paths and Saddle Points. *J. Chem. Phys.* **2000**, 113, 9978.

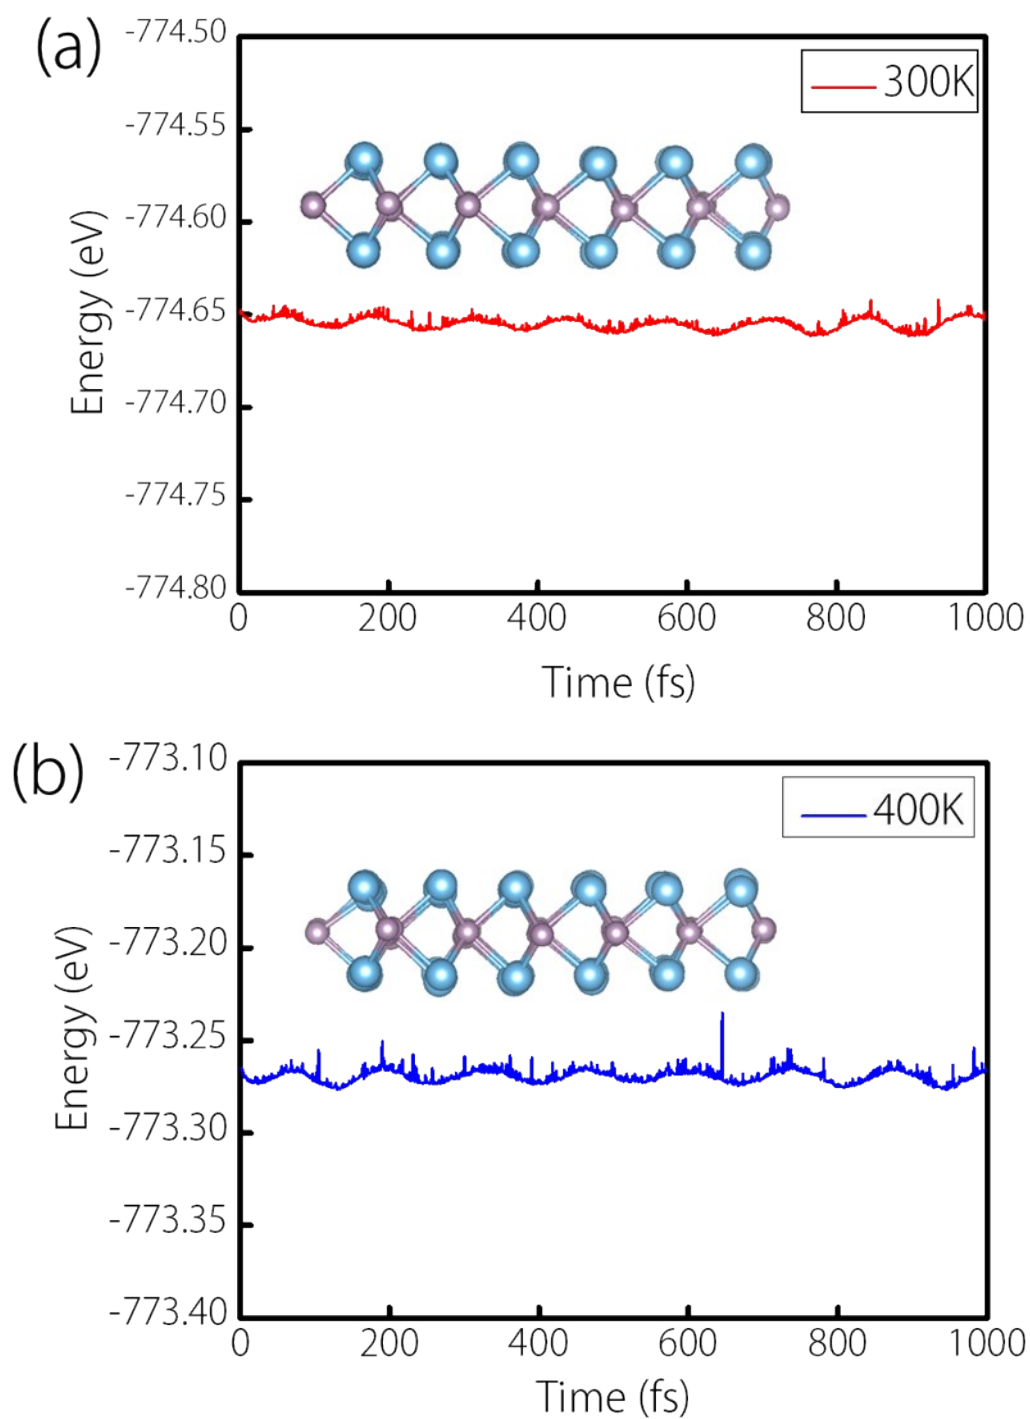

Figure S1 Evolution of the potential energy versus simulation time for  $\text{Ti}_2\text{P}$  monolayer during AIMD simulation at (a) 300K and (b) 400 K. The inset images (side views) are the geometries of  $\text{Ti}_2\text{P}$  monolayer at the end of the simulation.

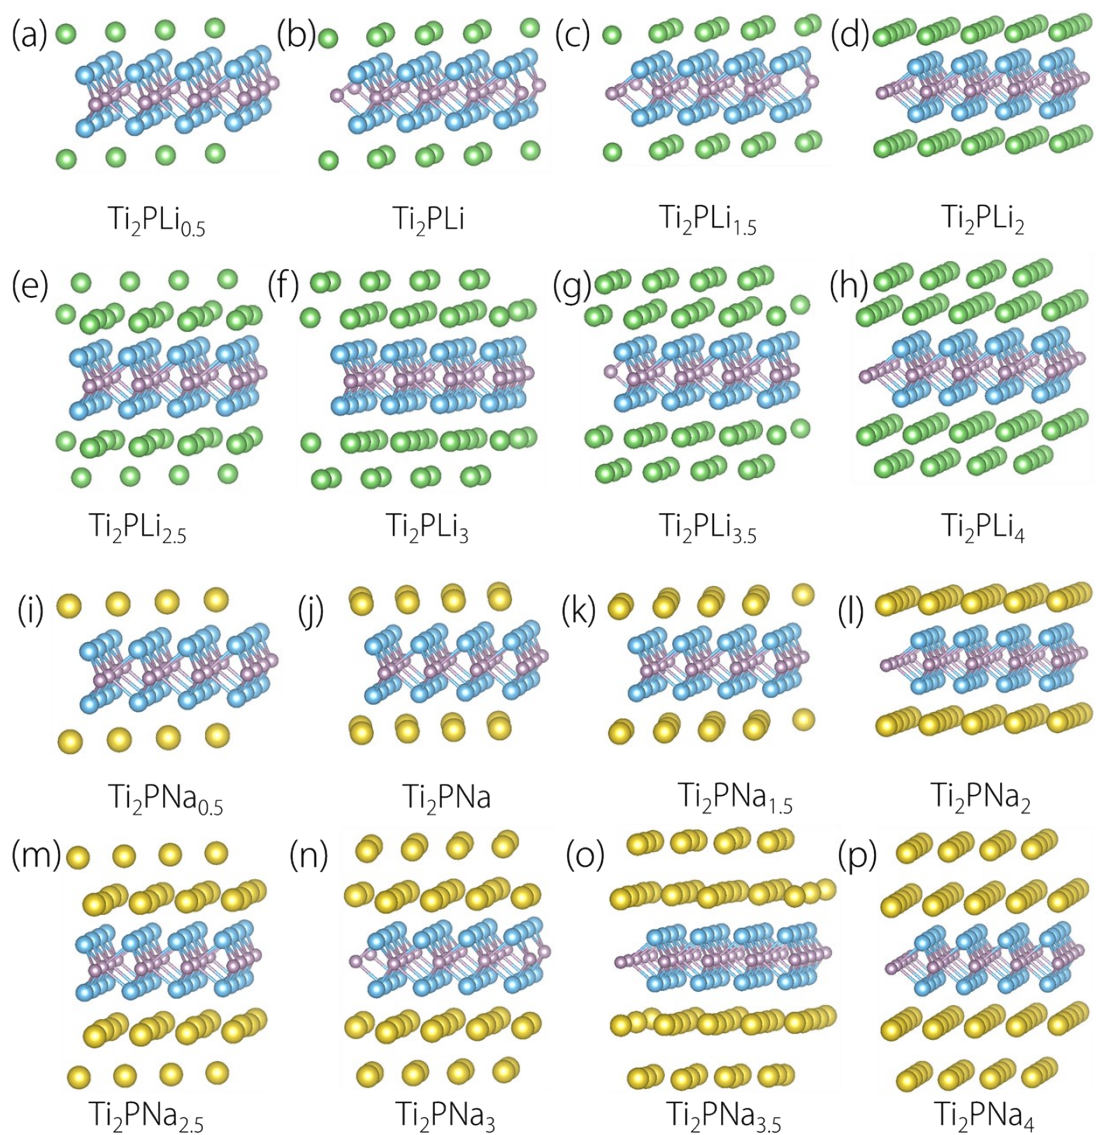

Figure S2 The optimized structures of the increasing of the Li/Na concentrations. The figures (a)–(h) represent the optimized structures of  $\text{Ti}_2\text{PLi}_x$  ( $x= 0.5\text{--}4$ ); and the images (i)–(p) represent the optimized structures of  $\text{Ti}_2\text{PNa}_x$  ( $x= 0.5\text{--}4$ ).

Table S1 Layered adsorption energy at different temperatures.  $E_{32\text{Li}+\text{sub}}$ ,  $E_{64\text{Li}+\text{sub}}$ ,  $E_{32\text{Na}+\text{sub}}$ , and  $E_{64\text{Na}+\text{sub}}$  represent the layer adsorption energies of the  $\text{Ti}_2\text{P}$  substrate adsorbed one layer of Li, two layers of Li, one layer of Na, and two layers of Na, respectively.

| Temperature | $E_{32\text{Li}+\text{sub}}$ (eV) | $E_{64\text{Li}+\text{sub}}$ (eV) | $E_{32\text{Na}+\text{sub}}$ (eV) | $E_{64\text{Na}+\text{sub}}$ (eV) |
|-------------|-----------------------------------|-----------------------------------|-----------------------------------|-----------------------------------|
| 0 K         | -0.67739                          | -0.06388                          | -0.58586                          | -0.17332                          |
| 300 K       | -0.66492                          | -0.02757                          | -0.56916                          | -0.16144                          |
| 400 K       | -0.66483                          | -0.02767                          | -0.56927                          | -0.16134                          |
